# Supplementary material for: Information Behavior of the Academic Community of FMVZ-UNAM
Source: Preprints.org preprint supplement (doi:10.20944/preprints202003.0306.v1), 2020-03-20
Supplement: Supplementary file 1 [file supplementary]

## Sheet: respuestas
Reg	Preg 1	otro 1	Preg 2	Preg 3								Preg 4																			Preg 5
				rev.email	rev.bib.	bd.bibliog	sitios int	prog y act PC	no uso	otro 3	uso 3	Abejas	Aves de compañía	Aves de producción	Bovinos de carne	Bovinos de leche	Caprinos	Conejos	Equinos	Fauna silvestre	Gatos	Mascotas no tradicionales (hurón, iguanas, etc)	Ovinos	Peces de consumo	Peces de ornato	Perros	Porcinos	Venados	Otra... Especifiq		Acupuntura	Administración de clínicas y farmacias veterinarias	Administración y economia pecuarias	Alimentos orgánicos de orígen animal	Anestesiología	Bienestar animal	Bioética	Biología molecular	Cardiología de pequeñas especies	Ciencias Médicas Básicas	Cirugía de grandes especies	Cirugía de mascotas no tradicionales	Cirugía de pequeñas especies	Dermatología de pequeñas especies	Desarrollo rural	Economía y administración	Educación veterinaria y didáctica	Enfermedades emergentes y re-emergente	Epidemiología
1	4		5	1	0	0	1	0	0	0		0	0	0	0	0	0	0	0	0	0	0	0	0	0	0	1	0	0		0	0	0	0	0	0	0	0	0	0	0	0	0	0	0	0	0	1	0
2	4		5	1	1	1	1	1	0	0		0	0	0	0	0	1	0	0	0	0	0	1	0	0	0	0	0	0		0	0	1	1	0	1	0	1	0	0	0	0	0	0	1	1	1	0	0
3	5		5	1	1	1	1	1	0	0		0	0	0	1	1	1	1	0	0	1	0	1	0	0	1	1	0	0		0	0	0	0	0	0	0	0	0	0	0	0	0	0	0	0	1	0	0
4	1		11	1	0	0	0	0	0	0		0	0	0	0	0	0	0	0	0	0	0	0	0	0	0	0	0	1	no corresponde	0	0	0	0	0	0	0	0	0	0	0	0	0	0	0	0	0	0	0
5	5		5	1	1	1	1	1	0	0		0	0	0	0	0	1	0	0	0	0	0	1	0	0	0	0	0	0		0	0	0	0	0	1	0	1	0	0	0	0	0	0	0	0	1	1	1
6	4		5	1	1	1	1	0	0	0		0	0	1	1	1	0	0	0	0	0	0	1	0	0	0	0	0	0		0	0	0	0	0	0	0	0	0	0	0	0	0	0	0	0	0	0	0
7	5		11	1	1	1	1	0	0	1	Administracion de curso en linea	0	0	0	1	0	1	0	1	1	1	0	1	0	0	1	1	1	0		0	0	0	0	0	0	0	1	0	1	0	0	0	0	0	0	1	1	0
8	1		9	1	1	1	0	0	0	0		0	0	0	0	0	0	0	0	0	0	0	1	0	0	0	0	0	0		0	0	0	0	0	0	0	0	0	0	0	0	0	0	0	0	0	0	0
9	4		5	1	1	1	1	0	0	0		0	0	0	0	0	0	0	0	0	0	0	0	0	0	0	0	0	1	reproduccion especificamente andrologia y semen todas las especies	0	0	0	0	0	0	0	1	0	0	0	0	0	0	0	0	0	0	0
10	4		6	1	1	1	1	0	0	0		0	0	0	0	0	0	0	0	0	0	0	0	0	0	0	1	0	0		0	0	0	0	0	0	0	0	0	0	0	0	0	0	0	0	0	0	0
11	5		5	1	1	1	1	0	0	0		0	0	0	1	1	1	0	0	0	0	0	1	0	0	0	0	0	0		0	0	0	0	0	0	0	0	0	0	0	0	0	0	0	0	0	0	0
12	1		11	1	0	0	0	0	0	1	utilizar programas de la UNAM	0	0	0	0	0	0	0	0	0	0	0	0	0	0	0	0	0	1	Administración Académica	0	0	0	0	0	0	0	0	0	0	0	0	0	0	0	0	0	0	0
13	5		11	1	1	1	1	0	0	0		0	0	0	0	0	0	0	0	0	0	0	0	0	0	0	1	0	0		0	0	0	0	0	0	0	1	0	0	0	0	0	0	0	0	0	0	0
14	5		11	1	1	1	1	1	0	0		0	0	0	0	0	0	0	0	0	0	0	0	0	0	0	0	0	1	EPIDEMIOLOGIA, SALUD PUBLICA, SISTEMAS DE INFORMACION GEOGRAFIA, VIDEO EDUCATIVO,	0	0	0	0	0	0	1	1	0	1	0	0	0	0	0	0	1	1	1
15	4		11	1	1	1	1	0	0	0		0	1	0	0	0	0	0	0	0	0	1	0	0	0	1	0	0	0		0	0	0	0	0	0	0	0	1	1	0	1	1	1	0	0	0	0	0
16	4		1	1	1	1	1	0	0	0		0	0	0	0	0	1	1	0	1	0	0	1	0	1	1	1	0	0		0	0	0	0	0	0	0	1	0	1	0	0	0	0	0	0	0	1	0
17	5		5	1	1	1	1	1	0	0		0	0	0	1	1	0	0	1	1	1	0	0	0	0	1	1	0	1	animales de laboratorio	0	0	0	0	0	0	0	1	0	1	0	0	0	0	0	0	0	0	0
18	5		1	1	1	1	1	1	0	0		0	0	0	0	0	1	0	0	0	0	0	0	0	0	0	0	0	0		0	0	0	0	0	0	0	1	0	1	0	0	0	0	0	0	0	0	0
19	4		6	1	1	1	1	1	0	1	comunicación con otros colegas nacionales y del extranjero	0	0	0	0	0	0	0	0	0	0	0	0	0	0	0	0	0	1	todas	0	0	0	0	0	0	0	0	0	0	0	0	0	0	0	0	0	0	0
20	4		1	1	1	1	1	0	0	0		0	0	0	0	1	0	0	0	0	0	0	0	0	0	1	0	0	0		0	0	0	0	0	0	0	1	0	0	0	0	0	0	0	0	0	0	0
21	4		7	1	1	1	0	0	0	0		0	0	0	0	1	0	0	0	0	0	0	0	0	0	0	0	0	0		0	0	0	0	0	0	0	0	0	0	0	0	0	0	0	0	0	0	0
22	4		1	1	1	1	0	0	0	0		0	0	0	1	1	1	0	0	0	0	0	1	0	0	0	0	1	0		0	0	0	1	0	1	1	1	0	0	0	0	0	0	1	0	0	0	0
23	5		5	1	1	1	1	0	0	1	Buscar imagenes para usar en clase	0	0	0	0	1	0	0	1	0	0	0	0	0	0	0	1	0	0		0	0	0	0	0	0	0	1	0	0	0	0	0	0	0	0	0	1	1
24	4		6	1	1	1	0	1	0	0		0	0	1	0	1	0	0	0	0	0	0	0	0	0	1	0	0	0		0	1	1	0	0	0	1	0	0	0	0	0	0	0	0	0	1	0	1
25	1		11	1	1	0	0	0	0	0		0	0	0	1	1	1	0	1	1	0	0	1	0	0	0	1	0	0		0	0	0	0	0	0	0	1	0	1	0	0	0	0	0	0	0	0	0
26	0		11	1	0	0	0	0	0	0		0	0	0	0	0	0	0	0	0	0	0	0	0	0	0	0	0	0		0	0	0	0	0	0	0	0	0	0	0	0	0	0	0	0	0	0	0
27	3		11	0	0	0	1	1	0	1	tener comunicación y dar seguimiento a los alumnos de especializacion, a traves, de la pagina de la especializacion bovinos	0	0	0	1	1	0	0	0	0	0	0	1	0	0	0	0	0	0		0	0	0	0	0	0	0	0	0	0	0	0	0	0	0	0	1	0	0
28	4		11	1	1	1	1	1	0	1	chat,clases por internet, cuentas de banco	0	1	1	1	1	0	0	1	1	0	0	1	0	0	0	1	0	0		0	1	1	1	0	0	0	1	0	0	0	0	0	1	1	1	1	0	0
29	4		1	1	1	1	0	0	0	0		0	0	0	0	0	0	0	0	0	0	0	0	0	0	0	0	0	1	microbiologia e inmunologia	0	0	0	0	0	0	0	1	0	0	0	0	0	0	0	0	0	1	1
30	5		12	1	1	1	1	1	0	0		0	0	0	0	1	1	0	1	1	1	1	1	0	0	1	0	0	0		0	0	0	0	0	0	0	1	0	0	0	0	0	0	0	0	0	0	0
31	4		5	1	1	1	1	0	0	0		0	1	1	0	0	0	0	0	0	0	0	0	0	0	0	0	0	0		0	1	1	1	0	1	1	1	0	0	0	0	0	0	1	1	1	0	0
32	4		1	1	1	1	1	1	0	0		0	0	0	0	0	1	0	0	0	0	0	1	0	0	0	0	0	0		0	0	0	0	0	1	0	0	0	0	0	0	0	0	0	0	0	0	0
33	4		1	1	1	1	1	0	0	0		0	0	0	0	1	0	0	0	0	0	0	1	0	0	1	0	0	0		0	0	0	0	0	1	1	0	0	0	0	0	0	0	0	0	0	0	0
34	3		5	1	0	1	0	0	0	0		0	0	0	0	0	0	0	0	0	1	0	0	0	0	1	0	0	0		0	0	0	0	0	0	0	0	1	0	0	0	0	0	0	0	0	0	0
35	3		11	1	1	1	0	1	0	0		0	0	0	0	1	0	0	0	0	0	0	0	0	0	0	0	0	0		0	0	0	0	1	0	1	0	0	0	0	0	1	0	0	0	1	0	0
36	1		5	0	1	1	1	0	0	0		0	0	0	1	1	0	0	0	0	0	0	0	0	0	0	0	0	0		0	0	1	0	0	0	0	0	0	0	0	0	0	0	1	1	1	0	0
37	4		6	1	1	1	0	0	0	0		0	0	0	1	1	1	1	0	0	0	1	1	1	0	0	1	0	0		0	0	0	1	0	0	0	0	0	0	0	0	0	0	0	0	0	0	0
38	5		5	1	1	1	0	0	0	0		0	0	1	1	1	0	0	0	0	0	0	0	0	0	1	0	0	0		1	0	0	0	0	0	0	0	0	0	0	0	0	0	0	0	0	0	0
39	3		11	1	1	1	1	0	0	0		0	0	1	0	0	0	0	1	0	0	0	0	0	0	1	1	0	0		0	0	0	0	0	0	0	1	0	1	0	0	0	0	0	0	1	1	1
40	7	ninguno	5	1	1	1	1	1	0	0		0	0	0	0	0	0	0	1	0	0	0	0	0	0	0	1	0	0		0	0	0	0	0	1	1	0	0	0	0	0	0	0	0	0	0	0	0
41	4		1	1	1	1	0	1	0	0		0	0	0	1	1	0	1	0	0	0	0	1	0	0	0	0	0	0		0	0	0	0	0	0	0	0	0	0	0	0	0	0	0	0	0	1	1
42	3		11	1	0	0	0	0	0	1	programa SIASS-UNAM	0	0	0	1	1	0	0	0	0	0	0	0	0	0	0	0	0	0		0	0	1	0	0	0	0	0	0	0	0	0	0	0	1	1	0	0	0
43	4		5	1	1	1	0	0	0	0		0	0	0	1	1	1	0	0	0	0	0	1	0	0	0	0	0	0		0	0	0	0	0	1	0	1	0	0	0	0	0	0	0	0	0	0	0
44	5		5	1	1	0	1	0	0	0		0	0	1	0	0	0	0	0	0	0	0	0	0	0	0	0	0	0		0	0	0	0	0	0	0	1	0	1	0	0	0	0	0	0	0	0	1
45	3		11	1	1	1	0	0	0	0		0	0	0	0	0	0	0	0	0	0	0	0	0	0	0	0	0	1	Casi todas las especies, estoy en el depatamento de Microbiología e Inmunología	0	0	0	0	0	0	0	1	0	0	0	0	0	0	0	0	0	1	1
46	4		6	1	1	1	1	0	0	1	comunicación instantanea	0	0	0	1	1	0	0	1	0	0	0	0	0	0	0	0	0	1	desarrollo rural, agricultura	0	0	1	0	0	0	0	0	0	0	0	0	0	0	1	1	0	0	0
47	5		5	0	1	1	0	0	0	0		0	0	0	1	1	0	0	0	0	0	0	0	0	0	0	0	0	0		0	0	0	0	0	1	0	1	0	0	0	0	0	0	0	0	0	0	0
48	4		1	1	1	1	1	0	0	0		0	0	1	0	0	0	0	1	0	0	0	0	0	0	0	0	0	0		0	0	0	0	0	0	0	0	0	0	0	0	0	0	0	0	0	0	0
49	4		11	0	1	0	0	0	0	0		0	0	0	1	0	0	0	0	0	0	0	0	0	0	0	0	0	0		0	0	0	0	0	0	0	0	0	0	0	0	0	0	0	0	0	0	0
50	4		5	1	1	1	1	0	0	0		0	0	0	0	1	1	0	0	0	0	0	1	0	0	0	0	0	0		0	0	0	0	0	0	0	0	0	0	0	0	0	0	0	0	0	0	0
51	5		5	1	0	1	0	1	0	1	Reservaciones de Vuelos; Alojamiento, etc., Para-Congresos, Cursos, etc.	0	0	1	0	0	0	0	0	0	0	0	0	0	0	0	1	0	0		0	0	0	0	0	1	0	1	0	1	0	0	0	0	0	0	0	1	1
52	6		5	1	1	1	1	1	0	0		0	0	0	1	1	0	0	0	1	0	0	0	0	0	0	1	0	0		0	0	0	1	0	1	0	0	0	0	0	0	0	0	1	1	0	0	1
53	5		5	1	1	1	1	1	0	0		0	0	0	0	0	1	0	0	0	0	0	1	0	0	0	0	0	0		0	0	0	1	0	1	0	0	0	1	0	0	0	0	0	0	1	0	0
54	5		5	1	1	1	1	1	0	0		0	1	1	0	0	0	0	0	0	0	0	0	0	0	0	0	0	0		0	0	0	1	0	1	1	1	0	0	0	0	0	0	0	0	0	1	0
55	2		6	1	1	0	0	0	0	1	Actividades académicas en línea.	0	0	0	1	0	0	0	1	0	0	0	0	0	0	1	0	0	0		0	0	0	0	0	1	0	1	0	1	0	0	1	0	0	0	1	0	0
56	1		6	1	0	1	0	1	0	0		0	0	0	0	0	0	0	0	0	0	0	1	0	0	0	0	0	0		0	0	1	0	0	0	0	0	0	0	0	0	0	0	0	1	0	0	0
57	5		5	1	1	1	1	0	0	0		0	0	0	1	1	1	0	0	0	0	0	1	0	0	0	0	0	0		0	0	0	0	0	0	0	0	0	0	0	0	0	0	0	0	1	0	0
58	5		5	1	1	1	1	1	0	0		1	1	1	1	1	1	1	1	1	1	1	1	1	1	1	1	1	0		0	0	0	0	0	1	1	0	0	0	0	0	0	0	0	0	0	1	1
59	0		0	0	0	0	0	0	0	0		0	0	0	0	0	0	0	0	0	0	0	0	0	0	0	0	0	0		0	0	0	0	0	0	0	0	0	0	0	0	0	0	0	0	0	0	0
60	2		5	1	1	0	1	1	0	0		0	0	0	0	0	0	0	0	0	0	0	0	0	0	0	0	0	1	bovinos de doble propósito	0	0	0	0	0	0	0	0	0	0	0	0	0	0	1	0	0	0	0
61	4		5	1	0	1	1	1	0	1	COMUNICACION CON MIS ALUMNOS	0	0	0	1	1	1	0	0	1	0	0	1	1	0	0	1	1	0		0	1	1	1	0	1	1	0	0	0	0	0	0	0	1	1	1	1	1
62	5		5	1	1	1	1	0	0	0		0	0	0	1	1	1	0	1	0	1	0	1	0	0	1	1	0	0		0	0	0	1	0	1	1	1	0	1	0	0	0	0	0	0	1	1	1
63	3		11	1	1	1	1	0	0	0		0	0	0	0	0	0	0	0	0	0	0	0	0	0	0	0	0	1	todas	0	0	0	0	0	0	0	0	0	0	0	0	0	0	0	0	0	0	0
64	7	ayudante profesor	7	1	1	1	1	0	0	0		0	1	1	0	0	0	0	0	0	0	0	0	0	0	0	0	0	1	investigacion inmunologia	0	0	0	0	0	0	0	1	0	0	0	0	0	0	0	0	0	0	0
65	4		5	1	1	1	1	0	0	0		0	0	0	1	1	0	0	0	0	0	0	0	0	0	0	0	0	0		0	0	0	0	0	0	0	0	0	0	0	0	0	0	0	0	1	0	0
66	1		11	1	1	1	1	0	0	0		0	0	0	0	0	0	0	0	0	0	0	0	0	0	0	0	0	1	Inocuidad y Calidad de los Alimentos de Origen Animal	0	0	0	0	0	0	0	1	0	0	0	0	0	0	0	0	1	1	1
67	4		1	1	1	1	1	0	0	0		0	0	0	0	0	0	0	0	0	0	0	1	0	0	1	0	0	0		0	0	0	0	0	0	0	0	0	0	0	0	0	0	0	0	0	1	0
68	1		9	1	1	1	1	0	0	0		0	0	0	0	1	1	0	1	0	0	0	1	0	0	0	0	0	0		0	0	0	1	0	0	0	0	0	0	0	0	0	0	0	0	0	0	0
69	5		5	1	1	1	1	1	0	0		0	0	1	0	0	0	0	0	0	0	0	0	0	0	0	0	0	0		0	0	0	0	0	1	0	1	0	1	0	0	0	0	0	0	0	1	1
70	4		5	1	1	1	1	1	0	0		0	0	1	1	1	1	1	1	0	0	0	1	0	0	0	1	1	0		0	0	0	1	0	1	0	0	0	0	0	0	0	0	1	1	1	0	0
71	1		11	1	0	0	1	0	0	0		0	0	1	0	1	0	0	0	0	0	0	0	0	0	0	0	0	0		0	0	0	0	0	0	0	0	0	1	0	0	0	0	0	0	1	0	0
72	5		5	1	1	1	1	1	0	0		0	0	0	1	1	1	0	1	1	1	1	1	0	0	1	1	1	0		0	0	0	0	0	1	0	0	0	0	0	0	0	0	0	0	0	0	0
73	0		0	0	0	0	0	0	0	0		0	0	0	0	0	0	0	0	0	0	0	0	0	0	0	0	0	0		0	0	0	0	0	0	0	0	0	0	0	0	0	0	0	0	0	0	0
74	4		11	1	1	1	1	0	0	1	Consulta lexicográfica, búsqueda y consulta de terminología especializada	0	0	0	0	0	0	0	0	0	0	0	0	0	0	0	0	0	1	Todas son de mi interés desde el punto de vista de mi especialidad: terminología especializada	0	0	0	0	0	0	0	0	0	0	0	0	0	0	0	0	0	0	0
75	4		11	1	1	1	1	1	0	1	comprar y cotizar equipos y servicios	0	0	1	0	0	0	0	0	0	0	0	0	0	0	0	0	0	0		0	0	0	0	0	0	0	1	0	1	0	0	0	0	0	0	0	0	0
76	2		11	1	1	1	1	0	0	0		0	0	0	0	0	0	0	1	0	1	0	0	0	0	1	0	0	0		0	0	0	0	0	0	0	0	0	0	0	0	0	0	0	0	0	0	0
77	1		11	1	1	1	1	0	0	0		0	0	0	0	0	1	0	0	0	0	0	1	0	0	0	0	0	0		0	0	0	1	0	1	0	0	0	0	0	0	0	0	0	0	0	1	0
78	1		1	1	1	0	1	0	0	0		0	0	0	0	0	0	0	0	0	0	0	0	0	0	1	0	0	0		0	0	0	0	0	1	1	0	0	0	0	0	0	0	0	0	0	0	0
79	5		5	1	0	1	1	0	0	0		0	0	0	0	0	0	0	0	0	0	0	0	0	0	0	0	0	1	Aspectos microbiológicos en todas las especies	0	0	0	0	0	0	0	0	0	0	0	0	0	0	0	0	0	0	0
80	4		5	1	1	1	1	0	0	0		0	0	0	0	0	0	0	0	0	0	0	1	0	0	0	0	0	0		0	0	0	0	0	0	0	0	0	0	0	0	0	0	0	1	0	0	0
81	4		1	1	1	1	0	0	0	0		0	1	1	0	0	0	0	0	0	0	0	0	0	0	0	0	0	0		0	0	0	0	0	1	0	0	0	1	1	0	0	0	0	0	0	1	1
82	4		1	1	1	1	1	0	0	0		0	0	1	0	0	0	0	0	0	0	0	0	0	0	0	0	0	0		0	0	1	0	0	0	0	0	0	0	0	0	0	0	0	0	0	0	0
83	4		13	1	1	1	1	0	0	0		0	1	1	0	0	0	0	0	1	1	1	0	0	1	0	0	0	0		0	1	0	0	1	1	0	1	0	0	0	0	0	0	0	0	0	1	1
84	4		6	1	1	1	1	1	0	0		0	0	0	0	0	0	0	0	0	1	0	1	0	0	0	0	0	0		0	0	0	0	0	0	0	0	0	0	0	0	0	0	0	0	0	0	0
85	5		5	1	1	1	1	1	0	0		0	0	0	1	1	0	0	0	0	0	0	1	0	0	0	0	0	0		0	0	0	0	0	0	0	0	0	0	0	0	0	0	0	0	0	0	0
86	0		5	0	1	1	1	1	0	0		0	0	0	0	1	1	0	0	0	0	0	1	0	0	0	0	0	0		0	0	0	0	0	0	0	1	0	0	0	0	0	0	0	0	0	0	0
87	5		5	1	1	1	0	0	0	0		0	0	0	0	0	0	0	0	0	0	0	0	0	0	0	0	0	0		0	0	0	0	0	0	0	0	0	0	0	0	0	0	0	0	0	0	0
88	5		1	1	1	1	0	0	0	0		0	0	0	1	1	0	0	0	0	0	0	0	0	0	0	0	0	0		0	0	0	0	0	0	0	1	0	0	0	0	0	0	0	0	0	0	0
89	4		1	1	1	1	1	1	0	0		0	0	0	0	0	0	0	0	1	1	1	0	0	0	1	0	0	0		0	0	0	0	0	1	0	0	0	1	0	1	1	0	0	0	0	0	0
90	6		5	1	0	1	0	0	0	1	escribir	0	0	1	0	0	1	0	0	0	0	0	0	0	0	0	0	0	1	microbios	0	0	0	0	0	0	1	1	0	0	0	0	0	0	0	0	0	1	1
91	1		5	1	1	1	1	0	0	0		0	0	0	0	0	0	0	0	0	0	0	0	0	0	0	0	0	1	estoy especializado en la morfología y esta abarca a todas las especies.	0	0	0	0	0	0	0	1	0	1	0	0	0	0	0	0	0	0	0
92	1		1	1	1	1	1	0	0	0		0	0	0	1	1	1	0	0	0	0	0	1	0	0	1	1	0	0		0	0	0	0	1	1	0	0	0	0	1	0	0	0	0	0	0	0	0
93	5		11	1	1	1	1	1	0	0		1	0	1	1	1	1	1	1	1	1	0	1	1	0	1	1	0	0		0	1	0	0	0	1	0	1	0	0	0	0	0	0	0	1	1	0	1
94	5		5	1	0	1	1	0	0	0		0	0	0	0	0	0	1	0	0	1	0	0	0	0	1	1	0	0		0	0	0	0	0	0	0	1	0	1	0	0	0	0	0	0	0	0	0
95	4		5	1	1	1	1	0	0	0		0	0	0	0	0	0	0	0	0	1	0	0	0	0	1	0	0	0		0	0	0	0	1	0	0	0	1	0	1	1	1	1	0	0	1	0	0
96	1		11	1	0	0	1	1	0	1	buscar y descargar manuales, escuchar radio	0	0	0	0	0	0	0	0	0	0	0	0	0	0	0	0	0	1	No busco animales	0	0	0	0	0	0	0	1	0	0	0	0	0	0	0	0	0	0	0
97	4		5	1	0	0	1	0	0	1	CONTACTO CON LOS ALUMNOS DE MAESTRIA	0	0	0	1	1	0	1	0	0	0	0	0	0	0	1	1	0	0		0	1	1	0	0	0	0	0	0	0	0	0	0	0	0	0	0	0	0
98	1		1	1	1	1	1	0	0	0		0	0	0	1	1	0	1	1	0	0	0	1	0	0	0	0	0	0		0	0	1	0	0	0	0	0	0	0	0	0	0	0	1	1	0	0	0
99	1		11	1	1	1	1	0	0	0		0	0	0	1	1	1	1	1	1	1	1	0	0	0	1	1	0	0		0	0	0	0	0	0	0	0	0	1	0	0	0	0	0	0	0	0	0
100	4		1	1	1	1	0	0	0	0		0	0	0	0	0	0	0	1	1	0	0	0	0	0	0	0	0	0		0	0	0	0	0	1	0	0	0	0	0	0	0	0	0	0	0	0	0
101	1		11	1	1	1	1	1	0	0		0	0	0	0	0	0	0	0	0	0	0	0	1	1	0	0	0	1	reptiles, anfibios, peces, crustáceos, moluscos, microalgas, protozoarios, nemátodos, etc.	0	0	0	1	0	1	0	1	0	0	0	1	0	0	1	0	0	0	0
102	1		11	1	1	1	1	1	0	0		0	0	0	0	0	0	0	0	0	0	0	0	1	1	0	0	0	1	reptiles, anfibios, peces, crustáceos, moluscos, microalgas, protozoarios, nemátodos, etc.	0	0	0	1	0	1	0	1	0	0	0	1	0	0	1	0	0	0	0
103	1		11	1	1	1	1	1	0	0		0	0	0	0	0	0	0	0	0	0	0	0	1	1	0	0	0	1	reptiles, anfibios, peces, crustáceos, moluscos, microalgas, protozoarios, nemátodos, etc.	0	0	0	1	0	1	0	1	0	0	0	1	0	0	1	0	0	0	0
104	1		11	1	1	1	1	1	0	0		0	0	0	0	0	0	0	0	1	0	0	0	1	1	0	0	0	1	reptiles, anfibios, peces, crustáceos, moluscos, equinodermos, microalgas, protozoarios, nemátodos etc.	0	0	0	1	0	1	1	1	0	0	0	1	0	0	0	0	0	0	0
105	5		5	0	1	1	0	1	0	0		0	0	0	0	1	0	0	0	0	0	0	0	0	0	0	0	0	0		0	0	0	0	0	0	0	0	0	1	0	0	0	0	0	0	0	0	0
106	5		5	1	1	1	1	1	0	0		0	0	1	1	1	1	1	1	1	1	0	1	0	0	1	1	1	1	Todas	0	0	0	0	0	0	0	0	0	1	0	0	0	0	0	0	1	0	0
107	4		1	1	1	1	1	0	0	0		0	0	0	0	1	1	0	1	0	0	0	0	0	0	0	0	0	0		0	1	1	1	1	1	0	0	0	0	1	0	0	0	0	0	0	0	0
108	1		1	1	0	0	0	0	0	0		0	0	0	0	0	0	0	1	1	0	1	0	0	0	1	0	0	0		0	0	0	0	0	1	0	0	1	0	1	1	1	0	1	0	0	0	0
109	4		1	1	1	1	0	0	0	0		0	0	0	0	0	0	0	0	1	0	0	0	0	0	0	0	0	0		1	0	0	0	0	1	0	1	0	1	0	0	0	0	0	0	0	1	0
110	1		1	1	1	1	1	1	0	1	Trabajo	0	0	0	1	1	0	0	1	0	0	0	0	0	0	1	0	0	0		0	0	0	0	0	1	0	1	0	1	0	0	0	0	0	0	0	0	0
111	4		1	1	1	1	0	0	0	0		0	0	1	0	0	0	0	0	0	0	0	0	0	0	0	0	0	0		0	0	0	1	0	0	0	0	0	0	0	0	0	0	0	0	0	0	0
112	1		1	1	1	1	1	1	0	0		1	1	0	0	0	1	1	1	1	1	1	1	0	0	1	0	0	1	fauna silvestre	0	0	0	1	1	1	1	1	1	1	1	1	1	1	1	1	1	1	1
113	1		1	0	0	0	1	0	0	0		0	0	0	0	0	0	0	0	0	1	0	0	0	0	1	0	0	0		0	1	0	0	1	1	0	0	0	0	0	0	1	0	0	0	0	0	0
114	4		6	1	1	0	1	1	0	0		0	0	0	0	0	0	0	0	0	0	0	1	0	0	0	0	0	0		0	0	0	0	0	0	0	0	0	0	0	0	0	0	0	0	0	1	1
115	6		5	1	1	1	1	1	0	0		0	0	0	1	1	0	0	0	0	0	0	1	0	0	0	0	0	0		0	0	1	0	0	0	0	0	0	0	0	0	0	0	1	1	0	0	1
116	4		11	1	1	1	0	0	0	0		0	0	0	0	0	0	0	0	0	0	0	0	0	0	0	1	0	0		0	0	0	0	0	0	0	1	0	0	0	0	0	0	0	0	0	1	1
117	4		5	1	1	1	0	0	0	0		0	0	0	0	0	0	0	0	0	0	0	1	0	0	0	0	0	0		0	0	0	0	0	1	0	0	0	0	0	0	0	0	0	0	0	0	0
118	4		1	0	0	0	0	0	0	0		0	0	0	0	0	0	0	0	0	0	0	0	0	0	0	0	0	0		0	0	0	0	0	0	0	0	0	0	0	0	0	0	0	0	0	0	0
119	1		1	1	1	1	1	1	0	1	Utilizar buscadores.	0	0	0	0	1	0	0	0	0	1	0	0	0	0	1	0	0	0		0	0	0	0	0	1	1	0	0	1	0	0	0	0	0	0	1	0	0
120	4		1	0	0	1	0	0	0	0		0	0	0	0	0	0	0	0	0	0	0	1	0	0	0	0	0	0		0	0	0	1	0	0	0	0	0	0	0	0	0	0	0	0	0	0	1
121	1		1	1	1	0	1	0	0	0		0	0	0	0	0	1	1	0	0	0	0	0	0	0	0	0	0	0		1	0	0	0	0	0	1	1	0	0	0	0	0	0	0	0	0	0	1
122	1		1	0	0	0	1	0	0	0		0	1	0	0	0	0	1	0	1	1	0	0	0	0	1	0	1	0		0	0	0	0	1	1	1	0	1	0	0	1	1	1	0	0	0	0	0
123	5		11	1	1	1	1	0	0	0		0	0	0	1	0	0	0	0	0	0	0	1	0	0	0	1	0	1	Impacto ambiental	0	0	1	1	0	1	0	0	0	0	0	0	0	0	1	1	0	0	0
124	5		5	1	1	1	1	1	0	0		0	0	0	1	0	1	0	0	0	0	0	1	0	0	0	1	0	0		0	0	1	1	0	1	0	0	0	0	0	0	0	0	1	0	0	1	0
125	6		5	1	1	1	1	1	0	0		0	0	0	1	1	0	0	0	0	0	0	0	0	0	0	0	0	0		0	0	0	0	0	0	0	1	0	1	0	0	0	0	0	0	1	1	1
126	4		6	1	1	1	1	1	0	0		0	0	0	0	0	0	0	0	0	1	0	0	0	0	1	0	0	0		0	0	0	0	0	1	1	0	0	0	0	0	0	0	0	0	1	0	0
127	5		5	1	1	1	1	1	0	0		1	0	1	1	1	0	0	0	1	0	0	1	1	0	1	1	1	0		0	0	0	0	0	0	0	1	0	0	0	0	0	0	0	0	0	0	0
128	2		6	1	1	1	0	0	0	0		0	0	0	0	0	0	0	1	0	0	0	0	0	0	1	0	0	0		0	0	0	0	1	0	0	0	0	1	0	0	1	0	0	0	1	0	0
129	4		1	1	1	1	1	0	0	0		0	0	0	1	1	0	0	0	0	0	0	0	0	0	0	0	0	0		0	0	0	0	0	0	0	1	0	0	0	0	0	0	0	0	0	0	0
130	4		1	1	1	1	1	1	0	0		0	0	0	1	1	0	0	0	0	0	0	1	0	0	0	1	0	0		0	0	0	0	0	1	0	0	0	0	0	0	0	0	0	0	0	0	0
131	4		7	1	1	0	1	1	0	0		0	0	0	0	0	0	0	0	1	1	1	0	0	0	1	0	0	1	Parasitología	0	0	0	0	0	0	0	1	0	1	0	1	1	0	0	0	0	0	1
132	1		1	1	1	0	1	0	0	0		0	0	0	0	0	0	0	0	1	0	0	0	0	0	1	1	0	0		0	0	0	0	1	1	1	0	0	1	0	0	0	1	0	0	1	0	1
133	4		1	1	1	1	1	0	0	0		0	0	0	0	0	0	0	0	0	0	0	0	0	0	1	0	0	0		0	0	0	0	0	0	0	0	1	0	0	0	1	1	0	0	0	0	0
134	1		1	1	1	1	1	1	0	0		0	1	0	0	0	0	0	0	0	1	1	0	0	1	1	0	0	0		1	1	0	1	1	1	0	1	1	1	0	1	1	1	0	0	1	1	1
135	4		5	1	1	1	1	1	0	0		0	0	0	0	0	1	0	0	0	0	0	1	0	0	0	0	0	0		0	0	0	0	0	1	0	0	0	0	0	0	0	0	0	0	0	1	1
136	1		1	1	1	1	1	0	0	0		0	0	0	0	0	0	0	1	0	1	0	0	0	0	1	0	0	0		0	0	0	0	1	1	1	0	1	0	0	0	1	1	0	0	0	1	1
137	4		11	0	0	1	0	0	0	1	preparar clases, conferencias, etc.	1	0	0	0	0	1	0	1	0	1	0	1	0	0	1	0	0	0		0	0	0	0	0	1	1	0	0	0	0	0	0	0	0	0	1	0	0
138	1		7	1	1	1	1	0	0	0		0	0	0	0	0	0	0	0	1	0	0	0	0	0	0	0	0	0		0	0	0	0	0	1	0	0	0	0	0	1	0	0	0	0	0	0	0
139	1		1	1	1	1	1	0	0	0		0	1	1	0	0	0	1	0	1	1	1	0	0	1	1	0	0	0		0	1	1	0	1	1	0	0	0	1	0	1	0	0	0	1	0	0	0
140	4		1	1	1	1	1	1	0	0		0	0	0	0	0	0	0	1	1	0	0	0	0	0	0	0	0	1	Anfibios	1	1	1	1	1	1	1	1	1	1	1	1	1	1	1	1	1	1	1
141	1		1	1	1	0	1	1	0	0		0	0	0	0	0	1	0	0	0	1	1	0	0	0	1	0	0	0		0	0	0	0	0	1	0	0	0	0	0	0	0	0	0	0	0	0	0
142	1		1	1	1	0	1	1	0	0		0	0	0	0	0	0	0	0	0	0	0	1	0	0	0	0	0	0		1	1	1	1	1	1	1	1	1	1	1	1	1	1	1	1	1	1	1
143	1		1	1	1	1	1	1	0	0		0	0	0	1	1	0	1	1	0	1	0	0	0	0	1	0	0	0		1	1	0	0	1	1	1	1	1	0	1	0	1	1	0	0	0	0	0
144	4		11	0	1	1	0	0	0	0		0	0	0	0	0	0	0	0	0	1	0	0	0	0	1	0	0	0		0	0	0	0	1	0	0	0	1	1	0	0	1	0	0	0	0	0	0
145	1		6	1	1	1	1	0	0	1	Clases y exàmenes en lìnea	1	0	0	0	0	0	0	0	0	0	0	0	0	0	0	0	0	1	Ecologìa	1	0	0	1	0	0	0	0	0	1	0	0	0	0	1	0	1	1	1
146	1		1	0	1	1	1	0	0	0		0	0	0	0	0	0	0	0	0	0	0	0	0	0	1	0	0	0		0	0	0	0	0	0	0	0	0	0	0	0	1	0	1	0	0	0	0
147	1		1	1	1	0	1	1	0	0		0	0	1	0	0	0	0	0	1	1	1	0	0	0	1	1	0	0		0	0	0	0	0	0	0	1	1	0	0	0	0	0	0	0	0	1	0
148	1		1	1	1	1	1	1	0	0		0	0	0	1	1	1	0	0	1	0	0	1	0	0	1	1	0	0		0	0	0	0	0	1	0	0	0	1	0	0	0	0	1	0	0	1	0
149	5		5	1	0	1	1	1	0	0		0	0	0	1	1	0	0	0	1	0	0	0	0	0	0	0	0	0		0	0	0	0	0	0	0	1	0	0	0	0	0	0	0	0	0	1	1
150	1		1	1	1	0	1	1	0	0		0	1	0	1	1	0	1	1	1	1	1	0	1	1	1	1	0	0		0	1	0	1	1	1	1	0	1	0	1	1	1	0	0	0	1	0	1
151	4		1	1	1	1	0	0	0	0		0	0	0	0	0	0	0	0	0	0	0	0	0	0	0	0	0	1	Microbiología	0	0	0	0	0	0	0	0	0	0	0	0	0	0	0	0	0	0	0
152	1		1	1	0	0	0	0	0	0		0	0	0	0	0	0	0	0	1	1	0	0	0	0	1	0	0	0		0	0	0	0	0	1	1	0	1	1	0	0	1	0	0	0	0	0	0
153	1		1	1	1	0	1	1	0	0		0	0	0	0	0	0	0	1	1	1	0	0	0	1	1	0	0	0		0	0	0	0	1	1	1	0	0	0	0	0	0	0	0	0	0	0	0
154	1		1	1	1	0	1	1	0	0		1	1	0	0	1	1	0	0	1	1	1	0	0	0	1	0	0	0		1	0	0	0	1	1	0	0	1	0	0	1	1	1	0	0	0	0	0
155	4		1	1	1	1	0	0	0	0		0	0	0	1	1	0	0	0	0	0	0	0	0	0	0	1	0	0		0	0	0	0	0	1	0	0	0	0	0	0	0	0	0	0	0	0	0
156	4		5	1	1	1	1	1	0	0		0	0	0	0	0	0	0	0	0	1	0	0	0	0	1	0	0	0		0	0	0	0	0	0	0	0	1	0	0	0	0	0	0	0	1	0	0
157	4		11	1	1	1	1	0	0	0		0	0	0	0	1	0	0	0	0	0	0	1	0	0	0	0	0	1	Educación	0	0	0	0	0	1	0	0	0	0	0	0	0	0	0	0	1	0	0
158	1		1	1	1	1	1	0	0	1	Paginas sociales	0	1	1	0	0	0	0	0	0	0	0	0	1	1	0	0	0	0		0	1	0	0	0	1	0	1	1	0	0	0	0	1	1	0	0	1	0
159	4		1	1	1	0	1	0	0	0		0	0	0	0	1	0	0	0	0	0	0	0	0	0	0	0	0	1	COMPORTAMIENTO ANIMAL	0	0	0	1	0	1	1	0	0	0	0	0	0	0	0	0	0	0	0
160	1		1	1	1	1	1	0	0	0		0	0	0	0	0	1	0	0	0	0	0	0	0	0	1	0	0	0		0	0	0	1	0	1	1	0	0	0	0	0	1	1	1	0	0	0	1
161	1		1	1	0	1	0	0	0	0		0	0	0	0	0	0	1	0	0	1	1	0	0	0	1	0	0	0		0	0	0	0	0	0	0	0	0	0	0	0	1	0	0	0	1	0	0
162	4		11	1	1	1	1	1	0	0		0	0	0	0	0	0	0	0	0	0	0	0	0	0	0	0	0	0		0	0	0	0	0	0	0	0	0	0	0	0	0	0	0	0	0	0	0
163	1		1	1	1	0	1	0	0	0		0	0	0	0	0	0	0	0	0	1	1	0	1	1	1	0	0	0		0	1	0	0	1	1	0	0	0	0	0	0	1	1	0	0	0	0	0
164	1		6	1	1	1	1	0	0	0		0	0	0	0	0	0	0	0	0	1	1	0	0	0	1	0	0	0		1	0	0	0	0	0	0	0	1	1	0	1	1	1	0	0	0	0	0
165	4		1	1	1	1	1	0	0	0		0	0	0	0	0	0	0	0	0	1	0	0	0	0	1	0	0	0		0	0	0	0	0	0	0	0	0	0	0	0	0	0	0	0	0	0	0
166	5		5	1	1	1	1	0	0	0		0	1	1	0	0	0	0	0	0	0	0	0	0	0	0	0	0	0		0	0	0	0	0	0	0	1	0	1	0	0	0	0	0	0	0	1	1
167	5		5	1	1	1	1	1	0	0		0	0	0	1	1	0	0	1	0	0	0	1	0	0	1	1	0	0		0	0	0	0	1	1	0	1	1	1	0	0	0	0	0	0	1	0	1
168	3		11	1	0	0	1	0	0	0		0	0	1	0	0	0	0	0	0	0	0	0	0	0	0	0	0	0		0	0	0	1	0	0	0	0	0	0	0	0	0	0	0	0	0	0	0
169	1		1	1	1	1	1	1	0	0		0	0	0	0	0	0	1	0	0	1	0	0	0	0	1	0	0	0		0	0	0	0	0	0	0	0	0	0	0	0	1	0	0	0	0	1	0
170	4		6	1	1	0	1	0	0	0		0	0	0	0	0	0	0	0	0	0	0	0	0	0	0	0	0	1	Alimentos y derivados de origen animal (todas las especies de abasto)	0	0	0	1	0	0	0	1	0	0	0	0	0	0	0	0	0	1	1
171	1		1	1	1	1	0	0	0	0		0	0	0	0	0	0	0	1	0	0	0	1	0	0	1	1	0	0		0	1	0	0	0	1	0	0	1	0	1	0	1	1	0	0	0	0	0
172	1		1	1	1	1	1	0	0	0		0	0	1	1	1	1	0	0	1	1	1	1	0	0	1	0	0	0		0	1	0	1	1	1	1	1	1	1	1	1	1	1	1	0	1	1	1
173	5		11	1	1	0	1	0	0	0		0	0	0	0	0	0	0	0	0	0	0	0	0	0	0	0	0	0		0	0	0	0	0	0	0	0	0	0	0	0	0	0	1	0	1	0	0
174	3		11	1	1	1	1	1	0	0		0	1	1	1	1	1	1	1	1	1	1	1	1	1	1	1	1	0		0	0	0	0	0	0	0	0	1	1	0	0	0	1	0	0	0	1	0
175	1		1	1	1	0	1	0	0	0		0	0	0	0	1	0	0	1	0	1	0	0	0	0	1	1	0	0		0	0	0	0	0	1	0	0	1	1	0	0	1	0	0	0	0	0	0
176	4		5	1	1	1	1	1	0	0		0	0	0	0	0	0	0	0	1	1	1	0	0	0	1	0	0	0		1	0	0	0	1	0	1	0	1	0	0	0	1	1	0	0	0	0	0
177	4		5	1	0	1	1	1	0	0		0	0	0	0	0	1	0	0	0	0	0	1	0	0	0	0	1	0		0	0	0	1	0	1	0	0	0	0	0	0	0	0	1	0	0	1	0
178	5		6	1	1	1	1	0	0	0		0	0	0	1	1	0	0	0	0	0	0	1	0	0	0	0	0	0		0	0	0	0	0	0	0	0	0	0	0	0	0	0	0	0	0	0	0
179	1		1	1	1	0	1	1	0	0		0	0	0	0	0	1	0	1	1	0	1	0	0	0	1	0	0	0		0	0	0	0	0	0	0	0	0	1	1	1	1	0	0	0	0	0	0
180	5		6	1	1	1	0	0	0	0		0	0	0	0	0	0	0	0	1	1	0	0	0	0	1	0	0	0		0	1	0	0	1	1	0	0	0	0	0	0	0	0	0	0	0	0	1
181	5		6	1	1	1	1	0	0	1	Trámites de diversas instituciones	0	0	0	0	1	1	0	0	1	1	0	1	0	0	1	0	0	0		0	0	0	0	0	0	0	1	1	1	0	0	0	0	0	0	0	0	1
182	4		1	0	1	0	0	0	0	0		0	0	0	0	0	0	0	0	0	1	0	0	0	0	1	0	0	1	reproducción de animales domésticos	0	0	0	0	0	0	0	1	1	1	0	0	1	1	0	0	0	0	0
183	1		6	1	1	1	1	0	0	0		0	0	0	0	0	0	1	0	0	1	0	0	0	0	1	0	0	0		0	0	0	1	0	1	0	0	0	1	0	0	0	1	0	0	0	0	0
184	5		5	1	1	1	1	1	0	0		0	0	0	0	0	1	0	0	0	0	0	0	0	0	0	0	0	0		0	0	0	0	1	1	1	0	0	0	0	0	0	0	0	0	0	0	0
185	1		1	1	1	1	1	0	0	0		0	0	0	0	0	0	0	0	0	1	0	0	0	0	1	0	0	0		1	0	0	0	0	1	1	0	0	0	0	0	0	0	0	0	0	0	0
186	1		1	1	1	1	1	0	0	0		1	1	1	0	0	1	1	1	1	0	1	0	0	1	1	0	0	0		1	1	0	1	1	1	1	0	0	1	1	1	1	1	1	1	1	1	1
187	1		1	1	1	1	1	1	0	0		1	0	0	0	0	0	0	1	1	0	0	0	0	0	1	0	0	0		0	0	0	0	0	0	0	1	0	1	0	0	0	0	0	0	0	0	0
188	4		11	1	1	1	0	0	0	0		0	0	0	0	0	0	0	0	0	0	0	0	0	0	0	1	0	0		0	0	0	0	0	0	0	0	0	0	0	0	0	0	0	0	0	0	0
189	4		11	1	1	1	1	0	0	0		0	1	1	0	0	0	0	0	0	1	0	0	0	0	1	0	0	0		0	0	0	0	0	0	0	1	0	0	0	1	1	0	0	0	0	0	0
190	3		11	1	1	0	1	0	0	0		0	0	0	0	0	0	0	0	0	0	0	0	0	0	0	0	0	1	animales de laboratorio	0	0	0	0	0	1	1	0	0	1	0	0	0	0	0	1	1	0	0
191	4		1	1	1	1	0	0	0	0		0	0	0	0	0	0	0	1	0	0	0	0	0	0	0	1	0	0		0	0	0	0	0	0	0	1	0	0	1	0	0	0	0	0	0	1	0
192	1		1	1	1	1	1	0	0	0		0	0	0	1	1	0	0	0	0	0	0	0	1	1	1	0	0	0		0	0	0	0	0	1	0	0	0	0	0	0	0	0	0	0	0	0	0
193	4		1	1	1	1	1	0	0	1	entretenimiento	0	0	1	0	0	0	0	0	0	0	0	0	0	0	0	0	0	0		0	0	0	0	0	0	0	0	0	1	0	0	0	0	0	0	0	0	0
194	1		1	1	1	1	1	1	0	0		0	0	0	1	1	0	0	0	0	0	0	0	0	0	0	0	0	0		0	0	1	0	0	1	0	0	0	0	1	0	0	0	0	1	0	0	0
195	4		5	1	1	0	0	1	0	0		0	0	0	0	0	0	0	0	0	0	0	0	0	0	0	0	0	0		0	0	0	0	0	0	0	0	0	0	0	0	0	0	0	0	0	1	1
196	4		11	1	0	1	1	0	0	1	Empleo de Facebook a través de ñl	0	0	0	0	0	0	0	0	0	0	0	0	0	0	0	0	0	0		0	0	0	0	0	0	0	0	0	0	0	0	0	0	0	0	0	0	0
197	4		11	1	0	1	1	0	0	1	Empleo de Facebook a través de ñl	0	0	0	0	0	0	0	0	0	0	0	0	0	0	0	0	0	0		0	0	0	0	0	0	0	0	0	0	0	0	0	0	0	0	0	0	0
198	4		11	1	0	1	1	0	0	0		0	0	0	1	1	1	0	0	0	0	0	0	0	0	0	0	0	0		0	0	0	0	0	0	0	0	0	0	0	0	0	0	0	0	0	1	0
199	4		5	1	1	1	1	1	0	0		0	0	0	1	1	0	0	0	0	0	0	0	0	0	0	0	0	0		0	0	1	1	0	0	0	0	0	0	0	0	0	0	0	1	0	0	0
200	1		1	1	1	0	1	0	0	0		0	0	0	1	0	0	0	0	0	0	0	1	0	0	0	0	0	0		0	1	0	0	0	0	0	0	0	0	0	0	0	0	0	0	0	0	0
201	4		11	1	1	0	1	1	0	0		0	0	0	1	1	0	0	0	0	0	0	0	0	0	0	0	0	0		0	0	0	1	0	0	0	0	0	0	0	0	0	0	0	0	0	0	0
202	6		11	1	1	1	0	0	0	0		0	0	0	1	1	1	0	0	0	0	0	1	0	0	0	0	0	0		0	0	0	0	0	0	0	1	0	1	0	0	0	0	0	0	0	0	0
203	1		7	1	1	1	1	1	0	0		0	0	0	0	0	0	0	0	0	0	0	0	0	0	1	0	0	0		0	0	0	0	0	0	0	0	0	1	0	0	0	0	0	0	0	0	0
204	4		1	1	1	1	1	0	0	0		0	0	0	1	1	0	0	0	0	0	0	0	0	0	0	0	0	0		1	0	0	0	0	0	0	0	0	0	1	0	0	0	0	0	0	0	1
205	4		1	1	1	1	1	0	0	0		0	0	0	0	0	0	0	0	0	0	0	1	0	0	0	0	0	0		0	0	0	0	0	0	0	0	0	0	0	0	0	0	0	0	0	0	0
206	4		1	1	1	1	0	0	0	0		0	0	0	1	1	0	0	0	0	0	0	0	0	0	0	0	0	0		0	0	0	0	0	0	0	0	0	0	0	0	0	0	0	0	0	0	0
207	4		1	1	1	1	1	0	0	0		1	0	1	0	0	1	0	0	0	1	0	1	0	0	1	0	0	0		1	0	0	1	0	1	0	1	0	1	0	0	0	0	1	1	1	0	0
208	5		5	1	1	1	1	0	0	0		0	1	0	0	0	1	0	1	1	1	1	0	1	0	1	0	0	0		0	0	0	0	0	0	0	0	0	1	0	0	0	0	0	0	0	1	0
209	4		4	1	1	1	1	0	0	0		0	0	0	1	1	0	0	0	0	0	0	0	0	0	0	0	0	0		0	0	0	0	0	0	0	0	0	0	0	0	0	0	0	0	0	0	0
210	4		6	1	1	1	1	1	0	0		0	0	1	1	1	0	1	0	0	0	0	1	0	0	0	1	0	0		0	0	1	0	0	1	0	0	0	0	0	0	0	0	1	1	0	0	0
211	1		1	1	1	1	0	0	0	0		0	0	0	0	0	0	0	1	0	1	0	0	0	0	1	0	0	0		0	0	1	0	0	0	0	0	0	0	0	0	0	0	0	1	0	0	0
212	1		1	1	1	1	1	0	0	0		0	0	0	0	0	0	0	0	0	0	0	0	0	0	0	1	0	0		0	0	0	0	0	1	1	1	0	1	0	1	0	0	1	0	1	0	1
213	5		5	1	1	1	1	1	0	0		0	0	0	1	1	1	0	0	0	0	0	1	0	0	0	0	0	1	desarrollo rural	0	0	1	0	0	0	0	0	0	0	0	0	0	0	1	1	1	0	0
214	1		1	1	1	1	1	0	0	0		0	0	1	0	0	1	0	1	0	0	0	0	0	1	0	1	0	0		0	0	0	0	1	0	0	0	0	0	1	0	0	0	0	0	0	0	0
215	1		1	1	1	0	1	0	0	0		0	0	1	0	0	0	0	0	0	1	0	0	0	0	1	0	0	0		0	0	0	0	0	1	0	0	0	1	0	0	1	0	0	0	0	0	0
[truncated: 90 more columns]

## Sheet: Pregunta 7
1	influenza porcina circovirus porcino
2
3
4	www.expendia.com para cotizar boletos de avión para ponentes extrajeros
5	artritis encefalitsi caprina Goat bahavior
6
7	Nombre del agente. enter Nombre de la enfermedad. enter Nombre del agente + huesped o tema. enter
8	Entro a pagina de la UNAM, de ahí voy a bibliotecas, luego a biblioteca digital, selecciono busqueda por proveedores, realizo, mi busqueda pidiendo articulos completos otra forma es ir la las revistas indexadas y ahí ver o bajar los articulos de mi inte	res. También via biblioteca digital, obtengo información de las tesis publicadas en mi area. para información estadistica utilizo paginas especializadas como FAOSTAT, OEIDRUS, SIAP-SAGARPA
9	cryopreservation semen (enter)
10
11	inmunomodulación en rumiantes
12
13	Vorología molecular, virus, técnicas diagnósticas, RT-PCR
14	"EPIDEMIOLOGY" [ENTER], "PUBLIC HEALTH" [ENTER]
15
16	nucletide sequence avian infectious bronchitis S1 gene. hypervariable regions of S1 gene on coranavirus
17	neuronas regenración crecimiento bovinos hormonas hormonas insulina páncreas eritropoyetina perros neuroprotección
18	Sistemas de patogenicidad (enter) Secuenciación ADN (enter) Cloruro de amonio (enter)
19
20	aspergillus [enter] restringir búsqueda bovinos or cows [enter]
21	Infertilidad en la vaca lechera
22	criobiologia de embriones ovinos en preimplantación- articulos de revision-
23	Mycoplasmas en cerdos
24	Administración Pecuaria Finanzas
25
26
27	Enfermedades de los bovinos de leche sistemas de produccion de ganado ovino aplicacion y uso de los masajes holistico
28
29	google academico + pubmed + scopus
30	Fatty liver cows cattle bovine Hepatitis dog canine Abdominal syndrome horse equine
31	Layer Hens eggs omega-3 Introns Ribosomal Interspace Findings Quality poultry meat satellite cells before by Molted Hens finish Phisiology Basis of barns design flew air Co2 O2 remove Enrofloxacin pssitacide dose pharmaceutic
32	milk sheep nutrition (enter) milk sheep grazing (enter) behaviour of sheep (enter) welfare of sheep (enter) grassland management (enter) sheep grazing lucerne (enter)
33	Reproducción en ovinos, Reproducción en bovinos
34	cardiologia perros gatos (enter) small animal cardiology (enter) cardiology dog cat (enter) valvular disease dog cat (enter)
35	función pedagógica jclic salones virtuales surgery
36	producción de bovinos México niveles de pobreza México
37	Nanoencapsulación en alimentos para peces
38	Google Altavista dgbiblio.unam.mx biblioteca FMVZ UNAM
39
40	Párasitos intestinales en perros
41
42	pardo suizo (enter)
43	Goat and sheep production dairy cattle feeding and nutrition
44	Escherichia coli poultry APEC Invasive Escherichia
45	Enfermedad de Tuberculosis Enfermedad de Brucella (ejemplos)
46	small-scale dairy production
47	Por autor (enter) Microsatélites en bovinos (enter) Rhipicephalus microplus (enter)
48	EHV-1 pcr from a murine model
49	Mètodos de determinación hormonal por medio de la tecnica de enzimoinmunoanalisis para muestras de suero bovino
50	ovinos sistemas alimentacion
51	Diarrea en cerdos; espiroquetas intestinales; enfermadades infecciosas en porcinos;
52	ganadería sustentable sustainable livestock production
53	phosphorus [enter] author names [enter]
54	Pollo de engorda (broilers) Gallina de postura (Laying hen) reproductoras (Broiler breeders) Poultry infections Poultry diseases
55	Estructuras embrionarias del ojo (enter)
56	Tipos de financiamiento credito
57
58	parásitos en fauna silvestre murcielagos parásitos en fauna silvestre tortugas parásitos en fauna silvestre coyotes parásitos en fauna silvestre sapos parásitos en fauna silvestre iguanas ectoparásitos en fauna silvestre pelícanos parásitos	en fauna silvestre en peces
59
60	tratamientos de mastitis clinica en vacas
61	COMERCIO INTERNACIONAL, INFLACIÓN EN MÉXICO, BANCO DE MÉXICO, SISTEMA DE ADMINISTRACIÓN TRIBUTARIA, FAO, CLARIDADES AGROPECUARIAS, EL FINANCIERO (PERIÓDICO), EL UNIVERSAL (PERIÓDICO).
62	prenatal programming ewe
63
64	anticuerpos monoclonales (enter)
65	produccion de leche en México
66	Salmonella Good Manufacture Parctice Food Safety
67	niveles de progesterona en cuerpo luteo ovinos (enter)
68	Nutricion en bovinos leche Alimentos geneticamente modificados alimentacion en equinos problemas alimenticios en equinos costos de ingredientes
69	avian immunology methods in virology
70	Clima y bien estar de los bovinos. Carga animal Cercos eléctricos Necesidades nutricias de las palómas Sostenibilidad pecuaria Teoria de sistemas pastoreo y parásitos en bovinos
71	Educación abierta y a distancia
72	Comportamiento caprino
73
74
75	antioxidantes amilasa protozooarios Determinación de proteína espectrofotometría
76	Journal of Veterinary Internal Medicine Compendium on Continuing Education for the Practicing Veterinarian webquestrubric
77	razas lecheras en ovinos medicion de leche en caprinos instalaciones pequeños rumiantes
78	"enfermedes Toxicoinfecciosas"[aves]
79	Brucelosis animal
80
81	patologia aviar enfermedades infecciosas de las aves
82	Infecciòn causada por Ornithobacterium rhinotracheale en las aves
83	enfermedades de aves de ornato parasitos de aves de produccion Actividad de mitocondria
84	Genética de poblaciones análisis de covarianza
85
86
87	reproducción de los bovinos en el trópico
88	Reproduction insulin IGF-I leptin beef or dairy cows (enter) qRT-PCR leptin or insulin or IGF-I (enter)
89	enfermedades aves aves enfermedades infecciosas aves
90
91	histologia del riñón
92	bovinos productos farmacologicos veterniarios
93	Enfermedades parasitarias Epidemiología de la fasciolosis Zoonosis parasitarias Enfermedades parasitarias en caprinos
94	Receptores a estrogenos y progesterona, conejos, cerdos, perros y gatos.
95	instalaciones quirofano perros vasectomia en perro objetivos de ENSEÑANZA
96	sybase store procedure mysql alter table css border php substring
97	bovinos.com
98	PARAMETROS PRODUCCITOVOS EN CONEJOS
99
100	reproduccion en animales de zoologico
101
102
103
104
105	Google Scirus Avian Toxic Infectious Desaese Luego pueden seguir varios refinamientos
106	No entiendo la pregunta
107	calidad de la leche caprinos enfermedades de los caprinos ciclo estral de la yegua
108	etología de fauna silvestre etología clínica en perros y gatos
109	titulo de articulos específicos
110	staphylococcus aerus caracteristics
111	formulacion de dietas para aves de postura
112	zoonosis en el mar enter tortugas marinas con papiloma enter
113	esterilizacion en perros y gatos. estirpacion de tumores en glandulas mamarias.
114	enfermedades de ostras tipos de pcr manual de toma de muestras
115	rural development, farmers beef cows potspartum embryo transfer
116	diagnóstico en enfermedades virales de los cerdos
117	Ovinocultura en Mexico (enter) Clorhidrato de Zilpaterol + carne ovina (enter)
118
119	Parasitologia veterinaria
120	busqueda de art cientificos pudmed dgbiblio todas las busquedas son en base al nombre o palabras claves a la busqueda
121	parasitologia, virus, mutacion de virus,etc
122	medicina interna dermatofitosis en perros
123	Environmental assessment environmental impact assessment meat processing
124	bienestar animal bovinos rastro plantas medicinales altiplano mexico plantas medicinales tropico seco mexico
125	Diagnóstico tuberculosis
126	problemas de conducta en perros y gatos behaviour problems bioetica en animales
127	Genética de perros
128	anatomia de los animales domesticos
129	embryo transfer bovine (enter) morphology evaluation embryo (enter)
130	Reproducción porcina Swine reproductive hormons Reporducción animal Hormones
131	Toxoplasmosis Uso de el succinato de metil prednisolona en hamsters Parásitos de gatos
132	Anatomia veterinaria patologia veterinaria clinicas veterinarias microbiologia veterinaria anatomia animal
133	Por tema o por palabras (enter)
134	TOXICOSIS POR IVERMECTINA EN COLLIE GEN MDR-1 OSTEOARTRITIS DESORDENES NEUROLOGICOS EN PERROS
135	Enfermedades de los ovinos Manejo reproductivo de pequeños rumiantes Intoxicaciones en ovinos Abortos en pequeños rumiantes Razas ovinas Enfermedades metabolicas en pequeños rumiantes
136	tratamientos para timpanismo en bovinos de carne(enter)
137	No entiendo la pregunta. Utilizo los operadores booleanos para optimizar las consultas
138
139	ortopedia en perros estudios clinicos de perros
140
141	parasitologia veterinaria medicina veterinaria anatomia veterinaria anatomia del perro anatomia comparada etc
142	Babesiosis virologia veterinaria
143
144	cierre de la comunicación interauricular en perros biomateriales y adhesivos tisulares en cirugía
145
146
147	dermatopatias en perros Cancer comunes en pequeñas especies
148
149
150	zoonosis, reproduccion canina, etc.
151	Vacunas comestibles enter
152	enfermedades de los gatos [enter]
153	bienestar animal orangután enriquecimiento ambiental mono japones
154	dermatofitosis perro gastroenteritis perro
155	gastric ulcers pigs growth promotors pigs
156	dogs hypertrophic cardiomiopathy lizards proliferative lesions bones exotic animals radiology
157
158	pirantel dosis perros
159	AUTOR+REVISTA+ENTER COMPORTAMIENTO DE PASTOREO EN BOVINOS+ENTER
160	parasitología (enter)
161	sindrome paraneoplasico pdf
162	information retrieve engine serch motores de búsqueda tecnologías de la información México tic méxico
163	vacunacion gatos comportamiento inflamacion de perdida de
164	medicina, cirugía y zootecnia perros y gatos (enter)
165	Mastocitemia en gatos Enteritis linfoplasmocitaria en perros Puentes portosistémicos Metabolismo del eritrocito
166	Chicken, virus Gallid herpesvirus
167
168
169	anestesia en pequeñas especies parasitos en perros
170	Toxicos naturales presentes en los alimentos de origen animal crudos
171
172	salmonella spp
173	Programas de fomento al campo Campesinos Técnicas didácticas Mujeres rurales Hombres rurales
174	Google Patologìa veterinaria neurocisticercosis
175	Infecciones gastointestinales Razas Busqueda de cachorros
176	enfermedad de distemper en huron helicobacter pilorum en caninos convulsiones idiopaticas
177	producción de caprinos
178	Ruminant nutrition
179	cirugia en equidos [enter] perros[enter] veterinaria[enter]
180	salud publica veterinaria enter
181	Ketorolaco inyectable dosis en perros (enter) Ecocardiografía en perros (enter) Guacamaya roja en México (enter) Transmisión connatal de Enfermedad de Chagas(enter) Rodriguez-Morales, O., Salmonella, competitive index (enter)
182	mescanismo del descenso testicular
183	Enfermedades genéticas de los conejos Enfermedades de importancia en salud pública Disposición de residuos
184
185	homeopatia veterinaria mexico medicina tracicional china fundamentos
186	parasitos comunes en borregos (enter) glucolisis (enter)
187	Enzimas
188	pubmed / boar semen (enter)
189	Genes hormonas esteroideas en aves (enter) Reproducción aves Hormonas reproductivas aves Foliculos aves
190	animales de laboratorio (enter) bioterios en mexico (enter) laboratory animal research (enter) lab animal (enter) mus musculus (enter)
191	CELULAS MADRE EN TERAPIA DE EQUINOS
192
193	aves, producciòn huevo
194	enfermedades del ganado bovino problemas de patas en ganado ovino mastitis bovina pastoreo grazzing nutrición de bovinos enfermedades de los becerros
195	Suscrito a servidores muy específicos: CDC, PAHO, OMS, OIE, sagarpa, SSA.
196
197
198	Reproducción caprina ó en caprinos ó en cabras(enter)
199	bovinos+leche+reproduccion
200
201	metodos diagnosticos salmonella
202	heterogeneidad de gonadotropinas VEGF Células de la granulosa cultivo primario
203	postgres select php explode
204
205	fracciones de proteina en el grano de sorgo fisiologia del grano quimica de los granos
206	inmunofluorescencia en ovocito bovino tecnicas inmunoensayo en ovocitos bovinos maduraciòn obovitos bovinos identificación de receptores para glucocorticoides en ovovcitos bobinos
207
208	Phityum insidiosum horse.
209	OXITOCINA MUERTE EMBRIONARIA BOVINOS
210	Determinación de costos de producció Produccion cunicola carga animal reproducción ovina punto de equilibrio anañisis financiero administracion pecuaria administracion de empresas
211	PERROS Y GATOS ARTICULOS CIENTIFICOS (ENTER)
212
213	rural development sustainable agriculture farming system research
214	alimentacion perros
215	enfermedades oftalmològicas en el perro

## Sheet: desc respuestas
Descripción de las respuestas
			Opciones
Núm	Pregunta		0	1	2	3	4	5	6	7	8	9	10
1	Seleccione cuál es el nivel académico que actualmente tiene o cursa			Licenciatura	Diplomado	Especialidad	Maestría	Doctorado	Posdoctorado	otra
			4	65	4	10	83	42	5	2	215
2	¿Cuál es su principal actividad académica en la Facultad?		0	1	2	3	4	5	6	7	8	9	10	11	12	13
			2	78	0	0	1	60	19	5	0	2	0	46	1	1	215
			rev.email (.E)	rev.bib.(F)	bd.bibliog (G)	sitios int.(H)	prog y act PC (I)	no uso (J)	otro 3 (K)	uso 3 (L)
3	Usted utiliza internet, para	0	16	32	45	53	136	215	190
		1	199	183	170	162	79	0	25
4	Qué especies animales son las de su interés o en cuáles es Usted especialista		Abejas	Aves de compañía	Aves de producción	Bovinos de carne	Bovinos de leche	Caprinos	Conejos	Equinos	Fauna silvestre	Gatos	Mascotas no tradicionales (hurón, iguanas, etc)	Ovinos	Peces de consumo	Peces de ornato	Perros	Porcinos	Venados	Otra	otra esp
			10	20	38	64	77	52	24	44	43	55	26	65	15	17	81	45	11	35
5	Qué temas son los de su interés en su búsqueda de información en internet		Acupuntura (AF)	Administración de clínicas y farmacias veterinarias (AG)	Administración y economia pecuarias (AH)	Alimentos orgánicos de orígen animal (AI)	Anestesiología (AJ)	Bienestar animal (AK)	Bioética (AL)	Biología molecular (AM)	Cardiología de pequeñas especies (AN)	Ciencias Médicas Básicas (AO)	Cirugía de grandes especies (AP)	Cirugía de mascotas no tradicionales (AQ)	Cirugía de pequeñas especies (AR)	Dermatología de pequeñas especies (AS)	Desarrollo rural (AT)	Economía y administración (AU)	Educación veterinaria y didáctica (AV)	Enfermedades emergentes y re-emergente (AW)	Epidemiología (AX)	Etología (AY)	Farmacología de grandes especies (AZ)	Farmacología de pequeñas especies (BA)	Gastroenterología de equinos (BB)	Gastroenterología de pequeñas especies (BC)	Genética (BD)	Geriatría y tanatología (BE)	Homeopatía veterinaria (BF)	Imagenología (radiología y ultrasonido) (BG)	Inmunología y vacunas (BH)	Legislación (BI)	Manejo y contención de fauna silvestre (BJ)	Manejo de pastizales (BK)	Medicina alternativa (BL)	Medicina de aves de compañía (BM)	Medicina de fauna silvestre (BN)	Medicina de grandes especies(BO)	Medicina de mascotas no tradicionales (BP)	Medicina de peces de ornato(BQ)	Medicina de pequeñas especies (BR)	Medicina preventiva (BS)	Microbiología (BT)	Neurología de pequeñas especies (BU)	Nutrición de monogástricos (BV)	Nutrición de rumiantes (BW)	Oftalmología (BX)	Oncología (BY)	Ortopedia (BZ)
			15	22	24	39	28	84	37	70	28	59	18	24	36	24	35	27	47	49	48	48	27	30	12	25	41	15	25	30	50	26	26	23	22	19	26	33	19	11	39	33	43	22	31	47	22	21	17
6	Qué buscadores emplea para realizar sus búsquedas de información en internet		Excite (CX)	Altavista (CY)	Google (CZ)	MSN (DA)	Yahoo (DB)	Google scholar (DC)	Otro (DD)	Otro 6
			4	21	195	21	0	0	42
8	De los resultados que le muestra el buscador, seleccione el motivo por el cuál decide activar (accesar)		breve desc.aprop. (DF)	prim.result. (DG)	conoce sitio (DH)	sitio acad. (DI)	editor conoc. (DJ)	otro (DK)
			140	48	79	114	59	11
9	De la información que le presenta el buscador, la que le resulta útil es porque		Sitio se actualiza K/ (DM)	Texto completo (DN)	Comunicación con lectores (DO)	Art. De investig. Reconoc. (DP)	sitios con links relac. (DQ)	Otro (DR)
			104	139	13	116	107	10
10	De la información que le presenta el buscador, la que NO CUBRE SU OBJETIVO es porque		info de sitio no es vigente (DT)	$ por tener Texto completo (DU)	publicidad comercial (DV)	sin aprob.de comité editorial (DX)	sitio confuso (DY)	ventanas emergentes o pornog. (DZ)	sitio inaccesible (EA)	otra causa (EB)
			88	134	76	50	84	0	0	10
11	¿En promedio a cuántos resultados que aparecen en su buscador entra?		no contestó (EC) 0	Máximo 3 (EC) 1	De 3 a 5 (EC) 2	De 5 a 10 (EC) 3	Más de 10 (EC) 4
			12	14	44	67	78
12	Seleccione qué tipo de información busca:		Documentos de texto(ED)	Presentaciones de diapositivas (EE)	Videos (EF)	Imágenes(EG)	Otro tipo... (EH)
			199	65	59	131	29
13	Para fines de valorar la difusión de la página de la facultad le pedimos por favor indique cuál es
	la dirección internet de la Facultad de Medicina Veterinaria y Zootecnia de la UNAM
[truncated: 23 more columns]
